# Supplementary material for: Title Page Predictive Value of Lymphocyte-to-Monocyte Ratio in Patients with Atrial Fibrillation: A Propensity Score Matching Analysis
Source: Research Square preprint supplement (doi:10.21203/rs.3.rs-914533/v1), 2021-09-21
Supplement: Supplementary file 1 [file 472a4a683265dddb63c52505.docx]

| **Data Sharing Statement** | | |
| --- | --- | --- |
| **Article Info** | n/a (editor will fill in this) | |
| **Item** | **Question** | **Authors’ Response （place “-” if not applicable）** |
| 1 | Would you like to share data collected for your study to others? | Yes |
| 2 | If not, would you like to share the reason for your decision? | - |
| 3 | What data in particular will be shared? | The data used in the statistical analysis of this study. |
| 4 | Any other documents will be share? Such as study protocol, statistical analysis plan, informed consent form, clinical study report, analytic code. | None. |
| 5 | When will data availability begin? | If this article is accepted, we will agree to share data. |
| 6 | When will data availability end? | 3 years after published |
| 7 | To whom will you share the data? | All the readers who are interested in our research. |
| 8 | For what type of analysis or purpose? | Any type of analysis or purpose. |
| 9 | How or where can the data/documents be obtained? | We have uploaded the raw data with the manuscript |
| 10 | Any other restrictions? | None. |
