# Supplementary material for: Title Page Predictive Value of Lymphocyte-to-Monocyte Ratio in Patients with Atrial Fibrillation: A Propensity Score Matching Analysis
Source: Research Square preprint supplement (doi:10.21203/rs.3.rs-914533/v1), 2021-09-21
Supplement: Supplementary file 2 [file ab6ea7b762c28a6bdae34e88.docx]

# Cover Letter

Dear Editors:

On behalf of my co-authors, I am submitting the enclosed material “*Predictive Value of Lymphocyte-to-Monocyte Ratio in Patients with Atrial Fibrillation: A Propensity Score Matching Analysis*” for possible publication in the *[BMC Cardiovascular Disorders](https://bmccardiovascdisord.biomedcentral.com/).*

All authors certify that they have participated sufficiently in the work to take public responsibility for the appropriateness of the study design and method, and the collection, analysis, and interpretation of the data. All authors are in agreement with the content of the manuscript.

*Contributions:* YY, ZW, and ML conceived the analysis. YY and PW extracted all data. YY, SW, and QX undertook and refined the inclusion process. YY, SW, and PW co-wrote the paper. YY, SW, YZ, JX, and XX undertook the statistical analyses. QY, WX, RH, ML, and JW were consulted for clinical issues. All authors contributed to and revised the final manuscript.

The authors have reviewed the final version of the manuscript and approve it for publication. To the best of our knowledge and belief, this manuscript has not been published in whole or in part nor is it being considered for publication elsewhere. Details about our study are in the attached files. Now all of them have been submitted online, and I look forward to hearing from you. If you have any questions, please feel free to contact me with the address at below.

Yours Sincerely,

Meiyun Liu, MD. Department of Anesthesiology, Shanghai Pulmonary Hospital, Tongji University School of Medicine, Shanghai, People's Republic of China. Address: No.507 Zhengmin Road, Huangpu District, Shanghai, 200003, People's Republic of China. Tel: (86) 18916380529, **Email：[liumeiyun0@126.com](mailto:liumeiyun0@126.com)**.

Zhinong Wang, MD, PhD. Department of Cardiothoracic Surgery, Changzheng Hospital, Naval Medical University, Shanghai, People's Republic of China. Address: No.415 Fengyang Road, Huangpu District, Shanghai, 200003, People's Republic of China. Tel: (86) 13601989808, Fax: 021-81885901, **Email: [wangzn007@smmu.edu.cn](mailto:wangzn007@smmu.edu.cn)**.
